# Supplementary material for: The signaling lipid sphingosine 1-phosphate regulates mechanical pain
Source: bioRxiv preprint, doi:10.1101/236778, version 3 (2018-03-15)
Supplement: Supplementary Materials [file 236778-3.xlsx]

## Sheet: Sheet1
Probe pair	% S1pr3	% Marker	% Co-labeled	% of marker+; S1pr3+	% of S1pr3+; marker+
S1pr3/Scn1a	53.6	30.3	21.4	70.6	39.9
S1pr3/Trpv1	40.7	49.4	27.3	55.2	67.1
S1pr3/Npy2r	35.3	10	7.2	72	20.4
S1pr3/Piezo2	42.6	73.4	35.3	48.1	82.8
S1pr3/Trpa1	47.1	39.7	16.2	40.8	34.4
